# Supplementary material
Source: publisher site journal article supplement (https://www.dovepress.com/article/381728)
Supplement: Supplementary file 1 [file get_supplementary_file.php]

**Table S1** Distribution of sex and age of the population in the GP Database and the entire Dutch population with and without diabetes – January 1, 2018

|  | **GP Database**  **N = 3,466,321** | **The Netherlands**  **N = 17,181,084** |
| --- | --- | --- |
|  | **%** | **%** |
| **Sex, females** | 50.3 | 50.4 |
| **Age (years)** |  |  |
| 0-4 | 4.2 | 5.1 |
| 5-17 | 14.6 | 14.7 |
| 18-44 | 34.1 | 33.3 |
| 45-64 | 28.0 | 28.2 |
| 65-74 | 11.1 | 10.9 |
| 75-84 | 5.9 | 5.8 |
| ≥85 | 2.1 | 2.2 |
| unknown | <0.5 | 0.0 |

**Table S2 e-Diabetes mellitus core set (summary)**

| **Description** | **Code** | **Abbreviation** | **Frequency of registrationa** |
| --- | --- | --- | --- |
| **Patient information** | **NHG** |  |  |
| Citizen service number | n.a. | n.a. | Once |
| First name(s) | n.a. | n.a. | Once + changes |
| Given name | n.a. | n.a. | Once + changes |
| Family name | n.a. | n.a. | Once + changes |
| Prefix family name | n.a. | n.a. | Once + changes |
| Date of birth | n.a. | n.a. | Once + changes |
| Sex | n.a. | n.a. | Once + changes |
| Address | n.a. | n.a. | Once + changes |
| Postal code | n.a. | n.a. | Once + changes |
| City | n.a. | n.a. | Once + changes |
| Phone number | n.a. | n.a. | Once + changes |
| Mobile number | n.a. | n.a. | Once + changes |
| **Main practitioner** | **NHG** |  |  |
| Main practitioner diabetes | 2206 | DMHB TZ | Once + changes |
| **Physical examination** | **NHG** |  |  |
| Height | 560 | LNGP AO | Once + changes |
| Weight | 357 | GEW AO | Yearly |
| BMI | 1272 | QUET AO | Yearly |
| Systolic / diastolic bloodpressure (1 of 3 methods below) |  |  | Quarterly |
| Systolic bloodpressure | 1744 | RRSY KA |  |
| Diastolic bloodpressure | 1740 | RRDI KA |  |
| Systolic bloodpressure (home measurement) | 2055 | RRSY KA MH |  |
| Diastolic bloodpressure (home measurement) | 2056 | RRDI KA MH |  |
| Systolic bloodpressure (average 24-hour measurement) | 2659 | RRGS KA MH |  |
| Diastolic bloodpressure (average 24-hour measurement) | 2660 | RRGD KA MH |  |
| **Laboratory** |  |  |  |
| HbA1c | 2816 | HBAC B | Yearly |
| Total cholesterol | 192 | CHOL B MT | Yearly |
| HDL-cholesterol | 446 | HDL B | Yearly |
| LDL-cholesterol | 542 or 2683 | LDL B of LDLD B | Yearly |
| Cholesterol / HDL-cholesterol ratio | 181 | CHHD B MI | Yearly |
| Triglycerides | 1377 | TRIG B | Yearly |
| Creatinine | 523 | KREA B | Yearly |
| (micro-) albumin urine or (micro-) albumin / creatinine ratio | 38, 40 | ALB U of ALBK U MI | Yearly |
| Renal function (1 of 3 methods below) |  |  | Yearly |
| MDRD (eGFR) | 1919 | KREM O FB | Preferred method |
| Cockcroft-Gault | 1918 | KREA O FB |  |
| Creatinine clearance | 524 | KREA O MK |  |
| **Foot examination** | **NHG** |  |  |
| Inspection left foot (diabetes) | 1697 | INSP LV LI | Yearly |
| Inspection right foot (diabetes) | 1698 | INSP LV RE | Yearly |
| Circulation left foot | 1641 | DBLO LV LI | Yearly |
| Circulation right foot | 1642 | DBLO LV RE | Yearly |
| Monofilament examination left foot | 1710 | MOFV NS LI | Yearly |
| Monofilament examination right foot | 1711 | MOFV NS RE | Yearly |
| Risk foot ulcers (Sims classification) | 2196 | RIVU SQ | Yearly |
| **Eye examination** | **NHG** |  |  |
| Fundoscopy (1 of 2 methods below) |  |  | Biennial (annually in the event of deviations found) |
| Fundoscopy | 2129 | FUFO FA |  |
| Date fundus photo | 1638 | DAFU FZ |  |
| Diabetic retinopathy left eye | 1652 | DMRP FA LI | biennial (annually in the event of deviations found) |
| Diabetic retinopathy right eye | 1653 | DMRP FA RE | biennial (annually in the event of deviations found) |
| **Life style and risk factors** | **NHG** |  |  |
| Smoking | 1739 | ROOK AQ | Yearly, among smokers |
| Smoking cessation advice given | 1814 | ADMI AQ | Yearly, among smokers |
| Alcohol consumption (1 of 2 methods below) |  |  | Yearly |
| Alcohol consumptionb | 1591 | ALCO PQ |  |
| Five-Shot questionnairec | 2423 | 5SHT PQ |  |
| Nutritional pattern (1 of 3 methods below) |  |  | Yearly |
| Details nutritional patternd | 2718 | BZVD AA |  |
| Remarks details nutritional patterne | 2138 | BYVD AA |  |
| Nutritional habits discussed (diabetes) | 1764 | VOED TZ |  |
| Healthy nutrition advice givenf | 2137 | ADVD AQ | Yearly, repeat on indication |
| Physical activityg | 3239 | NNGB AQ | Yearly |
| Physical activity advice given | 1816 | ADLB AQ | Yearly, repeat on indication |
| Therapy adherence (prevention CVD)h | 2198 | HVTM KQ | Yearly |
| **Relevant conditions** | **ICPC** |  |  |
| Diabetic retinopathy | F83.01 |  | Record if applicable/present |
| Angina pectoris | K74 |  | Record if applicable/present |
| Acute myocardial infarction | K75 |  | Record if applicable/present |
| Other / chronic ischaemic heart disease | K76 |  | Record if applicable/present |
| Hypertension uncomplicated | K86 |  | Record if applicable/present |
| Hypertension complicated | K87 |  | Record if applicable/present |
| Transient ischaemic attack | K89 |  | Record if applicable/present |
| Stroke/cerebrovascular accident | K90 |  | Record if applicable/present |
| Cerebral infarction | K90.03 |  | Record if applicable/present |
| Intermittent claudication | K92.01 |  | Record if applicable/present |
| Aortic aneurysm | K99.01 |  | Record if applicable/present |
| Diabetic neuropathy | N94.02 |  | Record if applicable/present |
| Down / depressed | P03 |  | Record if applicable/present |
| Depression | P76 |  | Record if applicable/present |
| Type 1 diabetes | T90.01 |  | Record if applicable/present |
| Type 2 diabetes | T90.02 |  | Record if applicable/present |
| Renal impairment / renal insufficiency | U99.01 |  | Record if applicable/present |
| Albuminuria / proteinuria | U98.01 |  | Record if applicable/present |
| **Medication** | **ATC** |  |  |
| Drugs used in diabetes | A10 |  | Record if applicable/present |
| Antihypertensives | C02 |  | Record if applicable/present |
| Diuretics | C03 |  | Record if applicable/present |
| Beta blocking agents | C07 |  | Record if applicable/present |
| Calcium channel blockers | C08 |  | Record if applicable/present |
| Agents acting on the renin-angiotensin system | C09 |  | Record if applicable/present |
| Lipid modifying agents | C10 |  | Record if applicable/present |
| Influenza vaccines | J07BB (ATC) or R44 (ICPC) |  | Record if applicable/present |

aThis column only shows what the guideline recommends, GP’s are free to individualise; bThis is the average use per day; cAdd up the scores of the answers to the questions in the Five Shot questionnaire (0-7). A score of 2.5 or higher raises suspicion of alcohol abuse or dependence; dRegister 'present' if the patient has a diet in relation to his condition or more generally that is potentially harmful to his health; eThese include a one-sided diet and/or a food pattern containing too much saturated fat, too many calories, too little fruit and vegetables or too much salt; fIndicate here that a healthy dietary advice has been given, in accordance with the current dietary advice from the Nutrition Centre ('Schijf van vijf'); gThe Dutch standard for healthy exercise (NNGB) implies for adults at least 30 minutes and for children and adolescents at least one hour of moderate exercise (cycling, brisk walking, gardening, etc) on at least five days per week. A person is inactive if on any day of the week they do not exercise for at least half an hour (adults) or an hour (children and adolescents) moderately intensively; hCaregiver’s impression of how the patient complies with the medication agreements for the prevention of CVD.

**Table S3** Flowchart of patient selection

|  | **Cumulative*** | **Active in 2020**** |
| --- | --- | --- |
| Persons in the general population of GP practices participating in STIZON | N = 4,952,533 | N = 2,740,920 |
| Persons with diabetes | N = 344,914 | N = 193,931 |
| T1D | N = 20,035 | N = 11,650 |
| T2D | N = 289,284 | N = 162,521 |
| Unclassified type of diabetes | N = 35,595 | N = 19,760 |

*Once registered as somewhere being present in a GP practice; **Registered as being present in the GP practice in 2020.

**Table S4** Cohort and patient characteristics of the active and lost to follow-up participants in the Diamant cohort

|  | **Active in 2020*** | **Lost to follow-up** |  |
| --- | --- | --- | --- |
|  | **N = 193,931**  **n (%)** | **N = 150,983**  **n (%)** | **p-value** |
| **Sex, females** | 96,206 (50) | 76,365 (51) | <.0001 |
| **Age at index date (years)**** |  |  | <.0001 |
| 0-4 | 1,483 (1) | 805 (1) |  |
| 5-17 | 4,188 (2) | 2,082 (1) |  |
| 18-44 | 40,301 (21) | 17,934 (12) |  |
| 45-64 | 98,865 (51) | 54,520 (36) |  |
| 65-74 | 36,249 (19) | 39,193 (26) |  |
| 75-84 | 11,514 (6) | 28,186 (19) |  |
| ≥85 | 1,331 (1) | 8,263 (5) |  |
| mean ± SD | 53.8 (15.7) | 62.1 (16.8) |  |
| **Year of index date**** |  |  | <.0001 |
| <2004 | 34,441 (18) | 43,554 (29) |  |
| 2004-2006 | 25,192 (13) | 25,020 (17) |  |
| 2007-2010 | 39,092 (20) | 33,981 (23) |  |
| 2011-2015 | 50,544 (26) | 31,553 (21) |  |
| 2016-2020 | 44,662 (23) | 16,875 (11) |  |
| **SES** |  |  | <.0001 |
| low | 71,201 (37) | 60,465 (40) |  |
| middle | 62,359 (32) | 47,273 (31) |  |
| high | 59,807 (31) | 42,816 (28) |  |
| unknown | 564 (<0.5) | 429 (<0.5) |  |
| **History duration (years), median (IQR)†** | 2.4 (0.0-7.5) | 0.0 (0.0-3.8) | <.0001 |
| **Follow-up duration (years), median (IQR)‡** | 10.6 (5.9-15.7) | 8.0 (3.5-13.2) | <.0001 |

*Registered as being present in the GP practice in 2020. **Among persons with T2D, index date was defined as the date of the first recorded diagnosis for T2D or the second prescription, whichever occurred first. Among persons with T1D, index date was defined as the date of the first recorded diagnosis for T1D. Among persons with an unknown type of diabetes, index date was defined as the date of the first recorded for diabetes diagnosis or the first prescription, whichever occurred first. ‡Time between index date and the end of registration, death or end of the study period.
